# Supplementary material for: AAV8-Mediated Angiotensin-Converting Enzyme 2 Gene Delivery Prevents Experimental Autoimmune Uveitis by Regulating MAPK, NF-κB and STAT3 Pathways
Source: PubMed Central journal article supplement (PMC4997264; doi:10.1038/srep31912), 2016-08-25
Supplement: srep31912-s1.pdf [file srep31912-s1.pdf]

# **AAV8-Mediated Angiotensin-Converting Enzyme 2 Gene Delivery Prevents Experimental Autoimmune Uveitis by Regulating MAPK, NF- $\kappa$ B and STAT3 Pathways**

Yiguo Qiu<sup>1</sup>, Lifei Tao<sup>1</sup>, Shijie Zheng<sup>1</sup>, Ru Lin<sup>1</sup>, Xinyu Fu<sup>1</sup>, Zihe Chen<sup>1</sup>, Chunyan Lei<sup>1</sup>, Jiaming Wang<sup>1</sup>, Hongwei Li<sup>2</sup>, Qiuhong Li<sup>3</sup>, Bo Lei<sup>1</sup>

<sup>1</sup> Department of Ophthalmology, the First Affiliated Hospital of Chongqing Medical University, Chongqing Key Laboratory of Ophthalmology, Chongqing Eye Institute, Chongqing, China

<sup>2</sup> School of Biotechnology, Southern Medical University, Guangzhou, Guangdong, China

<sup>3</sup> Department of Ophthalmology, University of Florida, Gainesville, Florida, USA

## **Supplementary Methods:**

### **Recombinant adeno-associated virus construction and packaging**

AAV vectors containing a secreted form of human *ACE2* gene or enhanced green fluorescent protein (eGFP) under the control of the chicken  $\beta$ -actin (CBA) promoter were constructed as previous studies<sup>1,2</sup>. The secreted ACE2 protein has been proved to be enzymatically activated in the preceding study<sup>3</sup>. These constructs contained expression cassettes flanked by the rAAV8 terminal repeats. Expressions of eGFP and ACE2 were driven by a CBA with a human cytomegalovirus enhancer. Site-directed mutagenesis of surface-exposed tyrosine residues on the capsids to generate AAV8(Y733F) mutation has been described recently<sup>4</sup>. Vector plasmid was packaged in AAV8 (Y733F) by transfection of HEK cells according to previously published

methods<sup>5</sup>. Vector doses were expressed as genome copies.

## References

1. Verma, A. et al. ACE2 and Ang-(1-7) confer protection against development of diabetic retinopathy. *Mol Ther* **20**,28-36 (2012).
2. Li, H. et al. Macrophage migration inhibitory factor in hypothalamic paraventricular nucleus neurons decreases blood pressure in spontaneously hypertensive rats. *Faseb J* **22**,3175-3185 (2008).
3. Huentelman, M.J., Zubcevic J., Katovich M.J. & Raizada M.K. Cloning and characterization of a secreted form of angiotensin-converting enzyme 2. *Regul Pept* **122**,61-67 (2004).
4. Petrs-Silva, H. et al. High-efficiency transduction of the mouse retina by tyrosine-mutant AAV serotype vectors. *Mol Ther* **17**,463-471 (2009).
5. Zolotukhin, S. et al. Recombinant adeno-associated virus purification using novel methods improves infectious titer and yield. *Gene Ther* **6**,973-985 (1999).

## Supplementary Table S1

**Table S1.** Fold changes of IFN- $\gamma$  and IL-17 at the protein level (VS. IRBP group)

| group        | cytokines     | protein fold change |
|--------------|---------------|---------------------|
| SB+IRBP      | IFN- $\gamma$ | 7.58                |
|              | IL-17         | 22.67               |
| SP+IRBP      | IFN- $\gamma$ | 8.76                |
|              | IL-17         | 12.83               |
| PD+IRBP      | IFN- $\gamma$ | 1.88                |
|              | IL-17         | 11.41               |
| BAY+IRBP     | IFN- $\gamma$ | 29.47               |
|              | IL-17         | 6.39                |
| S3I-201+IRBP | IFN- $\gamma$ | 70.29               |
|              | IL-17         | 11.34               |

## Supplementary Table S2

**Table S2. Primers used for Real-Time PCR analysis**

| Gene name     | Accession number | Sequences                                                                             |
|---------------|------------------|---------------------------------------------------------------------------------------|
| ACE2          | NM_001130513.1   | Forward: 5'-GATGTCATTCCTAGAAAGTGAAG-3'<br>Reverse: 5'-ACATACAGGAAGATGACAAGTG-3'       |
| IL-6          | NM_031168.1      | Forward: 5'-AGATAACAAGAAAGACAAAGCCAGAGTC-3'<br>Reverse: 5'-GCATTGGAAATTGGGGTAGGAAG-3' |
| IL-1 $\beta$  | NM_008361.3      | Forward: 5'-TTGAAGAAGAGCCCGTCC-3'<br>Reverse: 5'-CTTATGTTCTGTCCATTGAGGT-3'            |
| TNF- $\alpha$ | NM_001278601.1   | Forward: 5'-AGGCGCCACATCTCCCTCCA-3'<br>Reverse: 5'-CGGTGTGGGTGAGGAGCACG-3'            |
| MCP-1         | NM_011333.3      | Forward: 5'-AGTTGCCGGCTGGAGCATCC-3'<br>Reverse: 5'-TCTTTGGGACACCTGCTGCTGG-3'          |
| IL-10         | NM_010548.2      | Forward: 5'-GAAGACCCTCAGGATGCG-3'<br>Reverse: 5'-CCAAGGAGTTGTTTCCGTTA-3'              |
| IFN- $\gamma$ | NM_008337.3      | Forward: 5'-TCAAGTGGCATAGATGTGGAAGAA-3'<br>Reverse: 5'-TGGCTCTGCAGGATTTTCATG-3'       |
| IL-17         | NM_010552.3      | Forward: 5'-CTCAACCGTTCCACGTCACCCT-3'<br>Reverse: 5'-CCAGCTTCCCTCCGCATT-3'            |
| iNOS          | NM_010927.3      | Forward: 5'-GGGCTGTCACGGAGATCA-3'<br>Reverse: 5'-CCATGATGGTCACATTCTGC-3'              |
| Arg-1         | NM_007482.3      | Forward: 5'-GAACACGGCAGTGGCTTTAAC-3'<br>Reverse: 5'-TGCTTAGCTCTGTCTGCTTTGC-3'         |
| GAPDH         | NM_001289726.1   | Forward: 5'-GTATGACTCCACTCACGGCAA-3'<br>Reverse: 5'-GGTCTCGCTCCTGGAAGATG-3'           |
